# Supplementary material for: The Contribution of Music Abilities and Phonetic Aptitude to L2 Accent Faking Ability
Source: MDPI journal article supplement (doi:10.3390/languages8010068), 2023-02-27
Supplement: s1 [file s1]

## Section S1

### 1. Items of the accent faking accent

In the accent faking task, participants were asked to produce the following German sentences with a strong English accent:

- a. Ich gehe einkaufen und auch spazieren.
- b. Viele Menschen leben gerne in Österreich.
- c. Meine Mutter lebt in der Türkei.
- d. Ich trinke gerne schwarzen Kaffee.
- e. Warum sind so wenig Leute hier?
- f. Wer hat meine Tasche gesehen?

### 2. Language perception task

The speech perception task consists of multiple items, each containing a pair of items respectively called “Stimline” and “Stimcompare”. A Stimline consists of a certain number of Stims (between 8 and 12), where a Stim is a word or short phrase in a foreign language with a certain number of syllables. A Stimcompare consists of one, two, or three Stims, which participants need to compare to the Stimline. Stims are separated from each other by 50ms pauses.

On a given trial, the participant is first exposed to a Stimline. Two seconds later, participants are exposed to the Stimcompare. Participants are then asked to indicate whether all of the Stims presented in the Stimcompare sequence were included in the Stimline or not. When the *Stimcompare* contains two or three *Stims*, the answer “correct” is only correct if all these Stims were included in the Stimline. The task starts with a familiarisation phase and the trials are presented to the participants in a randomised order (see Christiner et al., 2022 for further details).

## Section S2

### 1. Intraclass coefficients

The tables included below report the reliability analyses we performed for the variables included in this study. Specifically, we computed intraclass correlation coefficients on the ratings for participants' performances on each item of the accent faking task, on the singing tasks and language production tasks, by using a two-way mixed effects model where people effects were random and measures effects were fixed. The results are show that the ratings were reliable and above the accepted value of 0.7 (Koo & Li, 2016).

#### 1.a Accent faking task

**Table S1. Intraclass correlation coefficients: Ich gehe einkaufen und auch spazieren.**

|                  | Intraclass<br>Correlation | 95% Confidence Interval |             | F Test with True Value 0 |     |     |       |
|------------------|---------------------------|-------------------------|-------------|--------------------------|-----|-----|-------|
|                  |                           | Lower Bound             | Upper Bound | Value                    | df1 | df2 | Sig   |
| Average Measures | .725                      | .451                    | .849        | 7.419                    | 96  | 384 | 0,000 |

**Table S2. Intraclass correlation coefficients: Viele Menschen leben gerne in Österreich.**

|                  | Intraclass<br>Correlation | 95% Confidence Interval |             | F Test with True Value 0 |     |     |       |
|------------------|---------------------------|-------------------------|-------------|--------------------------|-----|-----|-------|
|                  |                           | Lower Bound             | Upper Bound | Value                    | df1 | df2 | Sig   |
| Average Measures | .782                      | .610                    | .870        | 7.316                    | 96  | 384 | 0,000 |

**Table S3. Intraclass correlation coefficients: Meine Mutter lebt in der Türkei.**

|  | Intraclass<br>Correlation | 95% Confidence Interval |             | F Test with True Value 0 |     |     |     |
|--|---------------------------|-------------------------|-------------|--------------------------|-----|-----|-----|
|  |                           | Lower Bound             | Upper Bound | Value                    | df1 | df2 | Sig |

|                  |      |      |      |       |    |     |       |
|------------------|------|------|------|-------|----|-----|-------|
| Average Measures | .842 | .699 | .909 | 10.52 | 96 | 384 | 0,000 |
|------------------|------|------|------|-------|----|-----|-------|

**Table S4. Intraclass correlation coefficients: Ich trinke gerne schwarzen Kaffee.**

|                  |                        | 95% Confidence Interval |             | F Test with True Value 0 |     |     |       |
|------------------|------------------------|-------------------------|-------------|--------------------------|-----|-----|-------|
|                  | Intraclass Correlation | Lower Bound             | Upper Bound | Value                    | df1 | df2 | Sig   |
| Average Measures | .750                   | .504                    | .861        | 7.729                    | 96  | 384 | 0,000 |

**Table S5. Intraclass correlation coefficients: Warum sind so wenig Leute hier?**

|                  |                        | 95% Confidence Interval |             | F Test with True Value 0 |     |     |       |
|------------------|------------------------|-------------------------|-------------|--------------------------|-----|-----|-------|
|                  | Intraclass Correlation | Lower Bound             | Upper Bound | Value                    | df1 | df2 | Sig   |
| Average Measures | .720                   | .492                    | .835        | 6.112                    | 96  | 384 | 0,000 |

**Table S6. Intraclass correlation coefficients: Wer hat meine Tasche gesehen?**

|                  |                        | 95% Confidence Interval |             | F Test with True Value 0 |     |     |       |
|------------------|------------------------|-------------------------|-------------|--------------------------|-----|-----|-------|
|                  | Intraclass Correlation | Lower Bound             | Upper Bound | Value                    | df1 | df2 | Sig   |
| Average Measures | .740                   | .582                    | .835        | 5.428                    | 96  | 384 | 0,000 |

**Table S7. Intraclass correlation coefficients for all six sentences**

|                  |                        | 95% Confidence Interval |             | F Test with True Value 0 |     |     |       |
|------------------|------------------------|-------------------------|-------------|--------------------------|-----|-----|-------|
|                  | Intraclass Correlation | Lower Bound             | Upper Bound | Value                    | df1 | df2 | Sig   |
| Average Measures | .927                   | .897                    | .948        | 22.795                   | 96  | 384 | 0,000 |

## 1.b Language production tasks

**Table S8. Intraclass correlation coefficients for Mandarin**

|                  |                        | 95% Confidence Interval |             | F Test with True Value 0 |     |      |       |
|------------------|------------------------|-------------------------|-------------|--------------------------|-----|------|-------|
|                  | Intraclass Correlation | Lower Bound             | Upper Bound | Value                    | df1 | df2  | Sig   |
| Average Measures | .786                   | .702                    | .849        | 7.472                    | 96  | 1824 | 0,000 |

**Table S9. Intraclass correlation coefficients for Tagalog**

|                  |                        | 95% Confidence Interval |             | F Test with True Value 0 |     |      |       |
|------------------|------------------------|-------------------------|-------------|--------------------------|-----|------|-------|
|                  | Intraclass Correlation | Lower Bound             | Upper Bound | Value                    | df1 | df2  | Sig   |
| Average Measures | .795                   | .704                    | .860        | 8.218                    | 95  | 1425 | 0,000 |

**Table S10. Intraclass correlation coefficients for Japanese**

|                  |                        | 95% Confidence Interval |             | F Test with True Value 0 |     |      |       |
|------------------|------------------------|-------------------------|-------------|--------------------------|-----|------|-------|
|                  | Intraclass Correlation | Lower Bound             | Upper Bound | Value                    | df1 | df2  | Sig   |
| Average Measures | .875                   | .823                    | .913        | 13.627                   | 96  | 2208 | 0,000 |

**Table S11. Intraclass correlation coefficients for Farsi**

|                  |                        | 95% Confidence Interval |             | F Test with True Value 0 |     |      |       |
|------------------|------------------------|-------------------------|-------------|--------------------------|-----|------|-------|
|                  | Intraclass Correlation | Lower Bound             | Upper Bound | Value                    | df1 | df2  | Sig   |
| Average Measures | .839                   | .770                    | .889        | 9.726                    | 96  | 1440 | 0,000 |

**Table S12. Intraclass correlation coefficients for Slovak**

|                  |                        | 95% Confidence Interval |             | F Test with True Value 0 |     |      |       |
|------------------|------------------------|-------------------------|-------------|--------------------------|-----|------|-------|
|                  | Intraclass Correlation | Lower Bound             | Upper Bound | Value                    | df1 | df2  | Sig   |
| Average Measures | .801                   | .720                    | .861        | 8.320                    | 96  | 1824 | 0,000 |

## 1.c Singing tasks

**Table S13. Intraclass correlation coefficients for Melody**

|                  |                        | 95% Confidence Interval |             | F Test with True Value 0 |     |      |       |
|------------------|------------------------|-------------------------|-------------|--------------------------|-----|------|-------|
|                  | Intraclass Correlation | Lower Bound             | Upper Bound | Value                    | df1 | df2  | Sig   |
| Average Measures | .949                   | .930                    | .963        | 22.805                   | 96  | 1056 | 0,000 |

**Table S14. Intraclass correlation coefficients for Voice quality**

|                  |                        | 95% Confidence Interval |             | F Test with True Value 0 |     |      |       |
|------------------|------------------------|-------------------------|-------------|--------------------------|-----|------|-------|
|                  | Intraclass Correlation | Lower Bound             | Upper Bound | Value                    | df1 | df2  | Sig   |
| Average Measures | .967                   | .956                    | .976        | 32.506                   | 96  | 1056 | 0,000 |

**Table S15. Intraclass correlation coefficients for Rhythm**

|                  |                        | 95% Confidence Interval |             | F Test with True Value 0 |     |      |       |
|------------------|------------------------|-------------------------|-------------|--------------------------|-----|------|-------|
|                  | Intraclass Correlation | Lower Bound             | Upper Bound | Value                    | df1 | df2  | Sig   |
| Average Measures | .908                   | .870                    | .936        | 14.775                   | 96  | 1056 | 0,000 |

**Table S16. Intraclass correlation coefficients for Clarity/ Focus**

|                  |                        | 95% Confidence Interval |             | F Test with True Value 0 |     |      |       |
|------------------|------------------------|-------------------------|-------------|--------------------------|-----|------|-------|
|                  | Intraclass Correlation | Lower Bound             | Upper Bound | Value                    | df1 | df2  | Sig   |
| Average Measures | .932                   | .906                    | .952        | 19.130                   | 96  | 1344 | 0,000 |

**Table S17. Intraclass correlation coefficients for Volume**

|                  |                        | 95% Confidence Interval |             | F Test with True Value 0 |     |      |       |
|------------------|------------------------|-------------------------|-------------|--------------------------|-----|------|-------|
|                  | Intraclass Correlation | Lower Bound             | Upper Bound | Value                    | df1 | df2  | Sig   |
| Average Measures | .949                   | .929                    | .965        | 27.304                   | 96  | 1440 | 0,000 |

**Table S18. Intraclass correlation coefficients for Vocal range**

|                  | Intraclass<br>Correlation | 95% Confidence Interval |             | F Test with True Value 0 |     |      |       |
|------------------|---------------------------|-------------------------|-------------|--------------------------|-----|------|-------|
|                  |                           | Lower Bound             | Upper Bound | Value                    | df1 | df2  | Sig   |
| Average Measures | .880                      | .820                    | .920        | 13.920                   | 96  | 1248 | 0,000 |

## 2. Cronbach alpha's

To assess the interrater reliability of the individual eight questions asking participants about their singing behaviour during childhood, we computed Cronbach's  $\alpha$  coefficients. The results show that the reliability is high, with all Cronbach's  $\alpha = .813$ , and with all individual questions being above the statistically accepted range of 0.7 (we include Table 19 below for transparency).

**Table S19. Cronbach's  $\alpha$  coefficients for the singing during childhood questionnaire**

*Concept Singing behavior during childhood*

|                                                                                                                                         | Cronbach's $\alpha$ if<br>item deleted |
|-----------------------------------------------------------------------------------------------------------------------------------------|----------------------------------------|
| As a child I enthusiastically joined in with the singing at church and similar events whenever the possibility arose (Q1).              | .781                                   |
| As a child I was encouraged to sing by my caretakers and we sang together on a weekly basis even if there were no special events. (Q2). | .842                                   |
| As a child I enjoyed singing in a choir, with friends, at Christmas, birthdays, or at similar occasions (Q3).                           | .770                                   |
| As a child I sang very often since I wanted to become a musician or singer (Q4).                                                        | .794                                   |
| As a child I used to sing whenever I could such as in the bathroom, in the car, when I played with friends (Q5).                        | .801                                   |
| As a child I liked being a member of our school choir, or would have liked being a member or a school choir (Q6).                       | .758                                   |
| As a child I enjoyed singing a song that had been played to me (e.g., in the radio) (Q7).                                               | .804                                   |
| As a child I used to sing more often than my friends (Q8).                                                                              | .765                                   |

## Section S3

**Table S20| Correlations of the individual variables**

|                                  | Years of<br>formal<br>English<br>Instruction | Age of<br>onset | AMMA T | AMMA R | Singing<br>childhood | Singing<br>self | Singing<br>hours per<br>week | Singing total | Language<br>perception | Language<br>productio<br>n task | STM F  | STM B  |
|----------------------------------|----------------------------------------------|-----------------|--------|--------|----------------------|-----------------|------------------------------|---------------|------------------------|---------------------------------|--------|--------|
| English faking<br>accent         | .605**                                       | -.645**         | .140   | .180   | .123                 | .345**          | .168                         | .536**        | .261**                 | .386**                          | .330** | .329** |
| Years of formal<br>English instr |                                              | -.523**         | .137   | .052   | .156                 | .171            | .230*                        | .433**        | .078                   | .411**                          | .211*  | .230*  |
| Age of onset                     |                                              |                 | -.044  | -.082  | -.090                | -.170           | -.109                        | -.395**       | -.089                  | -.214*                          | -.195  | -.210* |
| AMMA T                           |                                              |                 |        | .775** | .140                 | .071            | .099                         | .298**        | .180                   | .439**                          | .145   | .215*  |
| AMMA R                           |                                              |                 |        |        | .047                 | -.004           | -.011                        | .325**        | .296**                 | .318**                          | .156   | .302** |
| Singing childhood                |                                              |                 |        |        |                      | .387**          | .502**                       | .400**        | -.106                  | .249*                           | .095   | -.123  |
| Singing self                     |                                              |                 |        |        |                      |                 | .460**                       | .531**        | -.012                  | .086                            | .179   | -.161  |
| Singing hours per<br>week        |                                              |                 |        |        |                      |                 |                              | .405**        | -.122                  | .063                            | .108   | -.132  |
| Singing total                    |                                              |                 |        |        |                      |                 |                              |               | .099                   | .422**                          | -.249* | .226*  |
| Language<br>perception           |                                              |                 |        |        |                      |                 |                              |               |                        | .285**                          | .258*  | .200*  |
| Language<br>production task      |                                              |                 |        |        |                      |                 |                              |               |                        |                                 | .494** | .421** |
| STM F                            |                                              |                 |        |        |                      |                 |                              |               |                        |                                 |        | .387** |

\* $p < .05$  (uncorrected, two-tailed). \*\*  $p < .001$  (uncorrected, two-tailed)

## Section S4

We ran a PCA analysis with the following singing variables: Melodic Singing Ability, Rhythmic Singing Ability, Voice Quality, Clarity/ Focus, Vocal Range, Volume, Singing Hours per Week, Singing Self-Estimation and Singing Childhood. We applied orthogonal rotation (varimax). The Kaiser-Meyer-Olkin measure for sampling adequacy for the analysis showed that KMO =.89 and all KMO variables were > .86, which was well above the accepted limit of .5. A Bartlett's test of sphericity,  $\chi^2 (36) = 1230.797$ ,  $p < .001$ , indicated that the correlations between items were sufficiently large to conduct a PCA analysis. A first analysis was run to obtain eigenvalues for each component in the data. Two components had eigenvalues over 1 and, in combination, they explained 83.40% of the variance (Table 21).

**Table S21. Summary of the PCA analysis with the singing variables only.**

|                          | Rotated Factor Loadings |                       |
|--------------------------|-------------------------|-----------------------|
|                          | Real singing tasks      | Self-reported singing |
| Voice Quality            | .942                    |                       |
| Clarity/ Focus           | .939                    |                       |
| Melodic Singing Ability  | .938                    |                       |
| Rhythmic Singing Ability | .919                    |                       |
| Vocal Range              | .912                    |                       |
| Volume                   | .901                    |                       |
| Singing Hours per Week   |                         | .835                  |
| Singing Childhood        |                         | .800                  |
| Singing Self-Estimation  |                         | .619                  |
| CRONBACH                 | 0.98                    | 0.710                 |
| Eigenvalues              | 6.325                   | 1.181                 |
| % explained              | 59.539                  | 23.861                |



Based on the results of the PCA, we created a new variable which we coined “Singing Total”. This new variable was obtained by averaging participants’ scores across the six original singing variables collected during the singing tasks: Melodic Singing Ability, Rhythmic Singing Ability, Voice Quality, Clarity/ Focus, Vocal Range, Volume.
